# Supplementary material
Source: PubMed Central journal article supplement (PMC4848237)
Supplement: NIHMS727202-supplement-Supp_FigureS1.pdf [file NIHMS727202-supplement-Supp_FigureS1.pdf]

## Supporting Materials

**Figure S1**

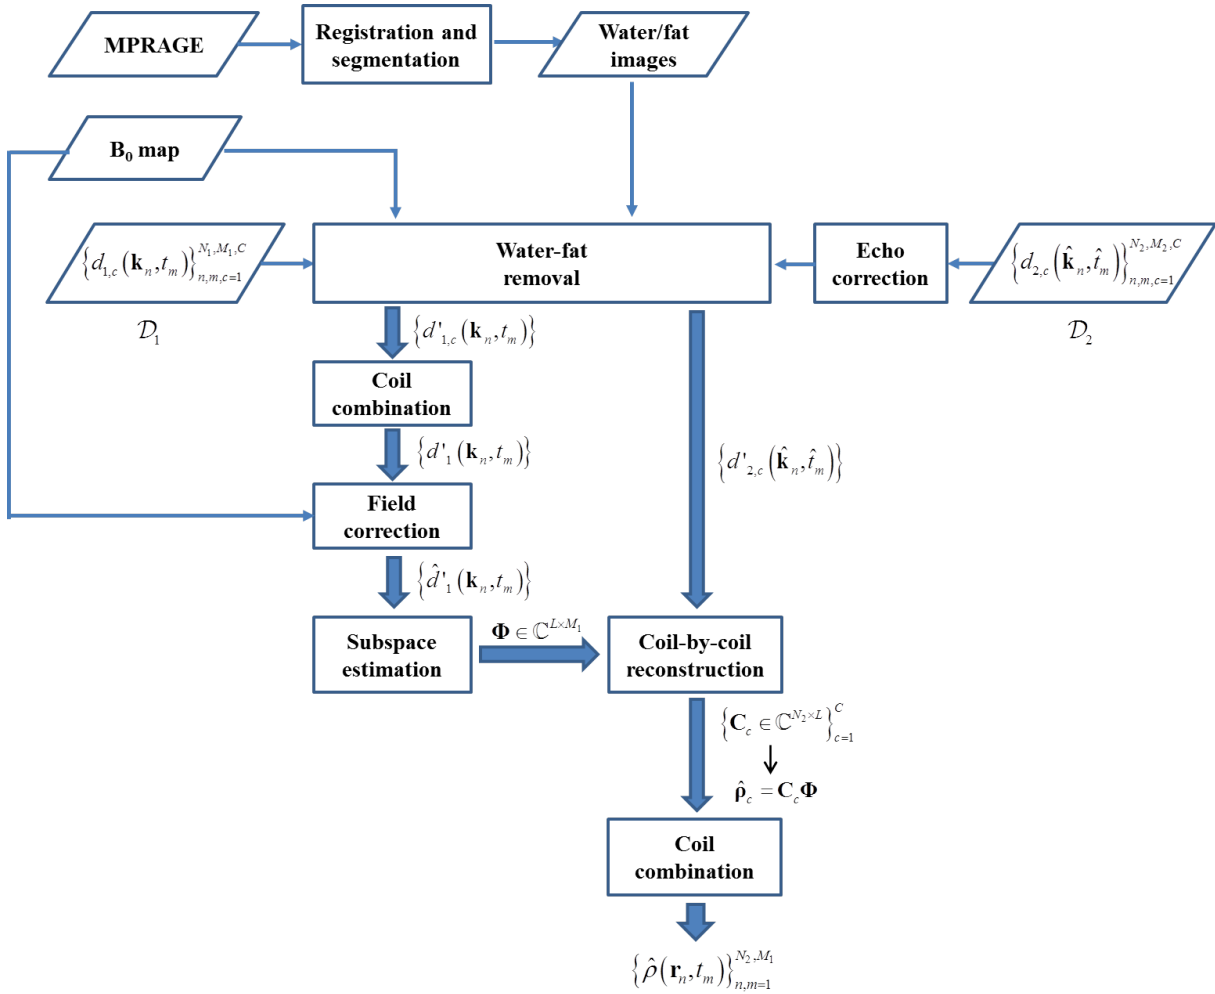

Figure S1: Data processing pipeline for  $^1\text{H}$ -MRSI of the brain using SPICE. The lower case letter  $c$  denotes the coil index.  $d'_{1,c}(\cdot)$  and  $d'_{2,c}(\cdot)$  denote the water-fat removed  $D_1$  and  $D_2$  for all the coils. The variables without the coil index denote the data after coil combination.
